# Supplementary material for: Establishment of a Transgenic Zebrafish Line for Superficial Skin Ablation and Functional Validation of Apoptosis Modulators In Vivo
Source: PubMed Central journal article supplement (PMC3105106; doi:10.1371/journal.pone.0020654), 2011-05-31

# [Fig. S1 ]

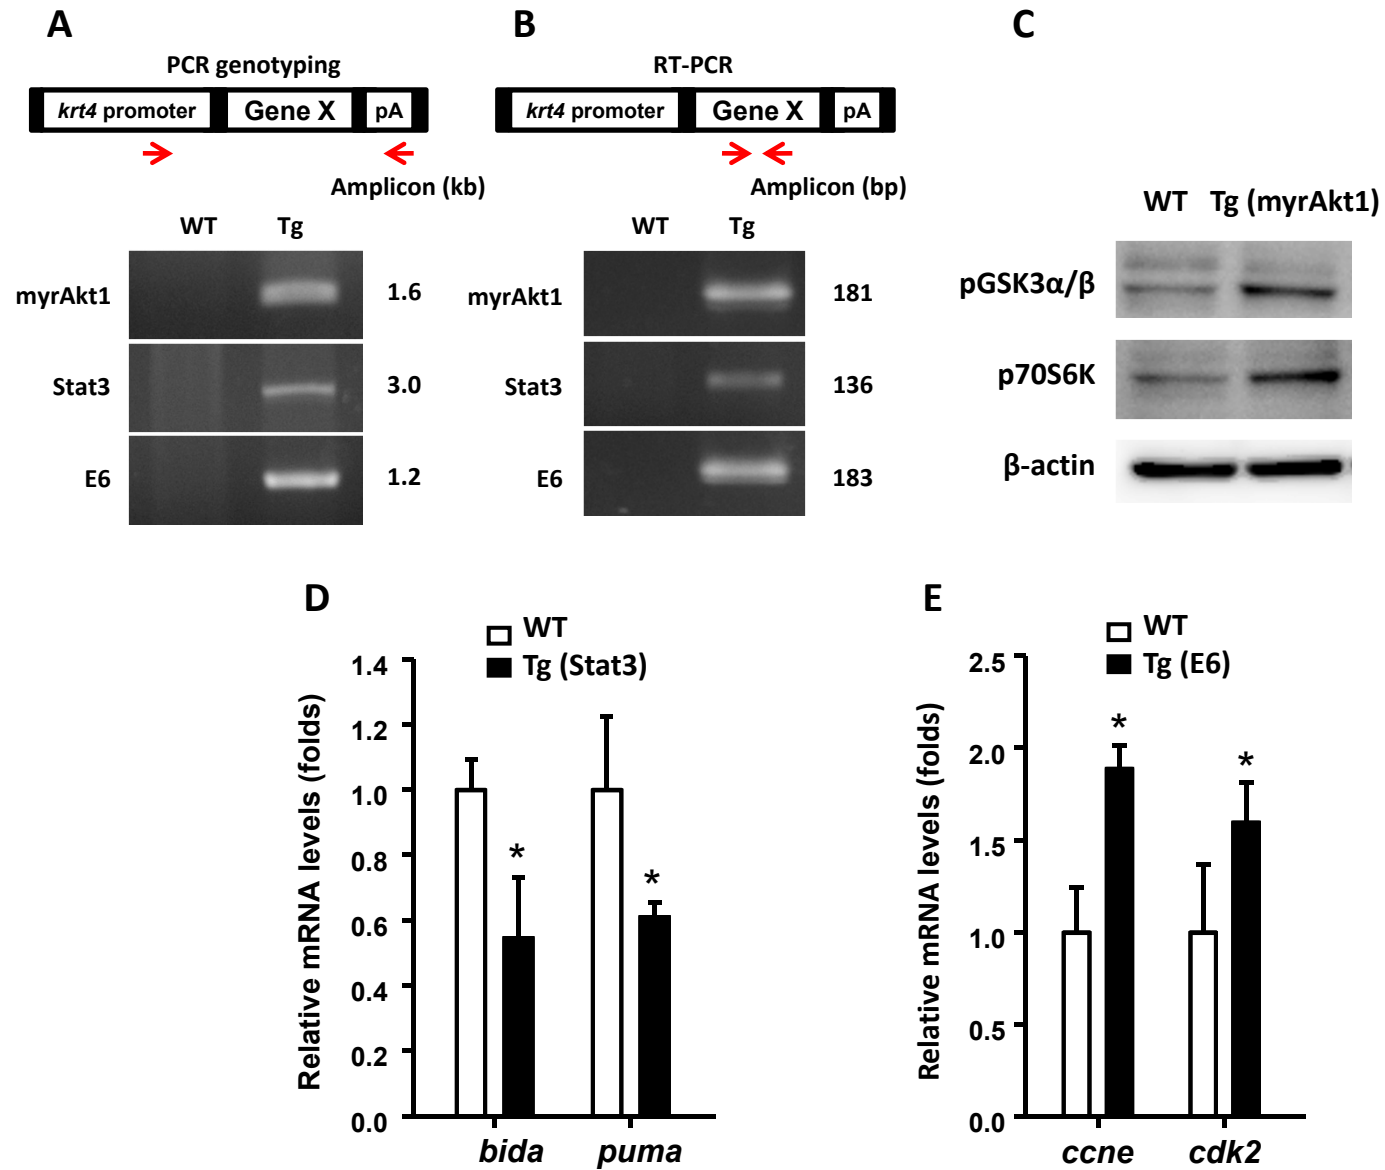

Supplement: pone.0020654.s001.pdf [file pone.0020654.s001.pdf]
